# Supplementary material
Source: Springer Nature journal article supplement (https://www.springermedizin.de/resource/supplementary/13014_2011_461_MOESM5_ESM.pdf/9633442)

Relative  $\gamma$ H2Ax IF(%)

XRT

HIT

KHOS-24OS

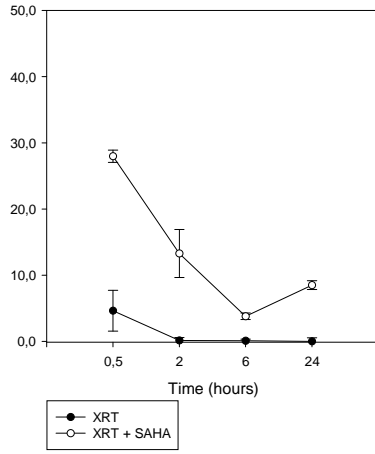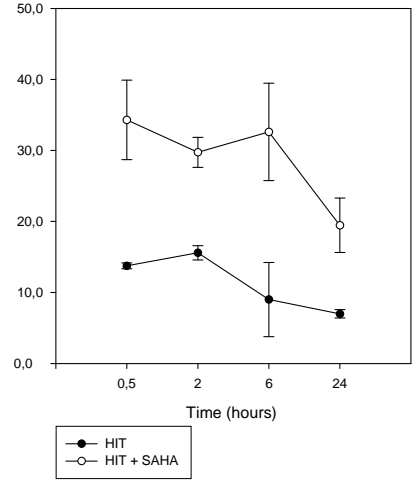

A-204

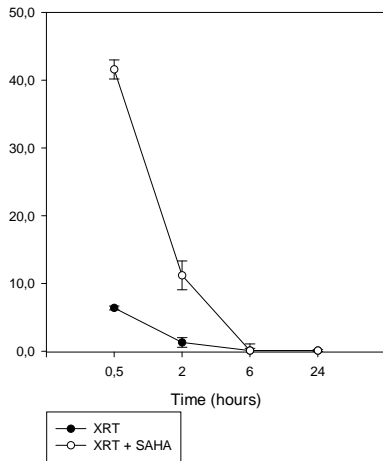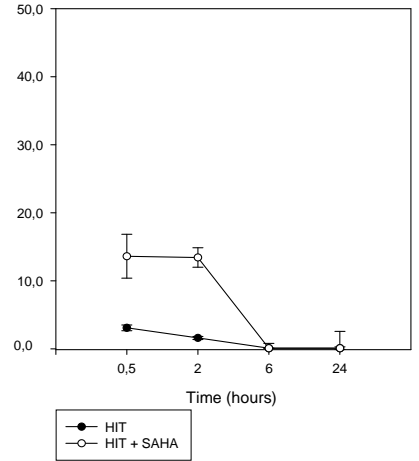

hFOB 1.19

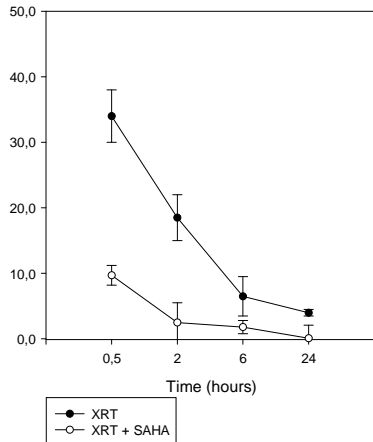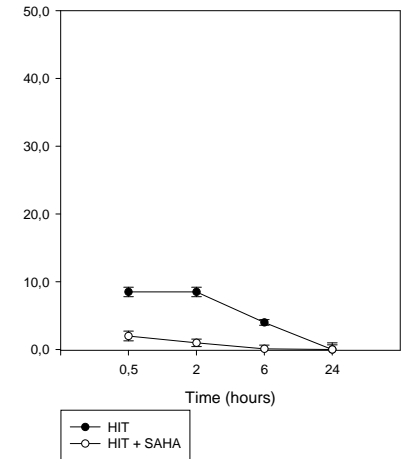

Supplement: MOESM5 [file 9633442]
